# Supplementary material for: Estimating a Preference-Based Index for Mental Health From the Recovering Quality of Life Measure: Valuation of Recovering Quality of Life Utility Index
Source: PubMed Central journal article supplement — Value Health. 2021 Feb;24(2):281–90. doi: 10.1016/j.jval.2020.10.012 (PMC7871010; doi:10.1016/j.jval.2020.10.012), 2021-02
Supplement: mmc1.pdf [file mmc1.pdf]

## Electronic Supplementary materials

### Appendix 1 ReQoL items

#### ReQoL-20 items

|                          |                                                                                                                                                       | <b>Response options</b>                                                                                                           |
|--------------------------|-------------------------------------------------------------------------------------------------------------------------------------------------------|-----------------------------------------------------------------------------------------------------------------------------------|
| 1.                       | I found it difficult to get started with everyday tasks *                                                                                             | 5 frequency-based options ranging from: none of the time, only occasionally, sometimes, often, most or all of the time.           |
| 2.                       | I felt able to trust others *                                                                                                                         |                                                                                                                                   |
| 3.                       | I felt unable to cope *                                                                                                                               |                                                                                                                                   |
| 4.                       | I could do the things I wanted to do *                                                                                                                |                                                                                                                                   |
| 5.                       | I felt happy *                                                                                                                                        |                                                                                                                                   |
| 6.                       | I thought my life was not worth living *                                                                                                              |                                                                                                                                   |
| 7.                       | I enjoyed what I did *                                                                                                                                |                                                                                                                                   |
| 8.                       | I felt hopeful about my future *                                                                                                                      |                                                                                                                                   |
| 9.                       | I felt lonely *                                                                                                                                       |                                                                                                                                   |
| 10.                      | I felt confident in myself *                                                                                                                          |                                                                                                                                   |
| 11.                      | I did things I found rewarding                                                                                                                        |                                                                                                                                   |
| 12.                      | I avoided things I needed to do                                                                                                                       |                                                                                                                                   |
| 13.                      | I felt irritated                                                                                                                                      |                                                                                                                                   |
| 14.                      | I felt like a failure                                                                                                                                 |                                                                                                                                   |
| 15.                      | I felt in control of my life                                                                                                                          |                                                                                                                                   |
| 16.                      | I felt terrified                                                                                                                                      |                                                                                                                                   |
| 17.                      | I felt anxious                                                                                                                                        |                                                                                                                                   |
| 18.                      | I had problems with my sleep                                                                                                                          |                                                                                                                                   |
| 19.                      | I felt calm                                                                                                                                           |                                                                                                                                   |
| 20.                      | I found it hard to concentrate                                                                                                                        |                                                                                                                                   |
| Physical health question | Please describe your physical health (problems with pain, mobility, difficulties caring for yourself or feeling physically unwell) over the last week | 5 severity-based options ranging from: no problems, slight problems, moderate problems, severe problems and very severe problems. |

\*ReQoL -10 consists of the first ten items and ReQoL-20 is made up of the 20 items. Both versions contain the last physical item which is not included in the summative score. Further details, sample copies, scoring guides and requests for permissions to use the ReQoL measures are available from: The Clinical Outcomes team at Oxford University Innovation Ltd at: <http://innovation.ox.ac.uk/outcome-measures/recovering-quality-life-reqol-questionnaire/> ReQoL™ (10 and 20) – © Copyright, University of Sheffield 2016 2018. All Rights Reserved.

Appendix Figure A1

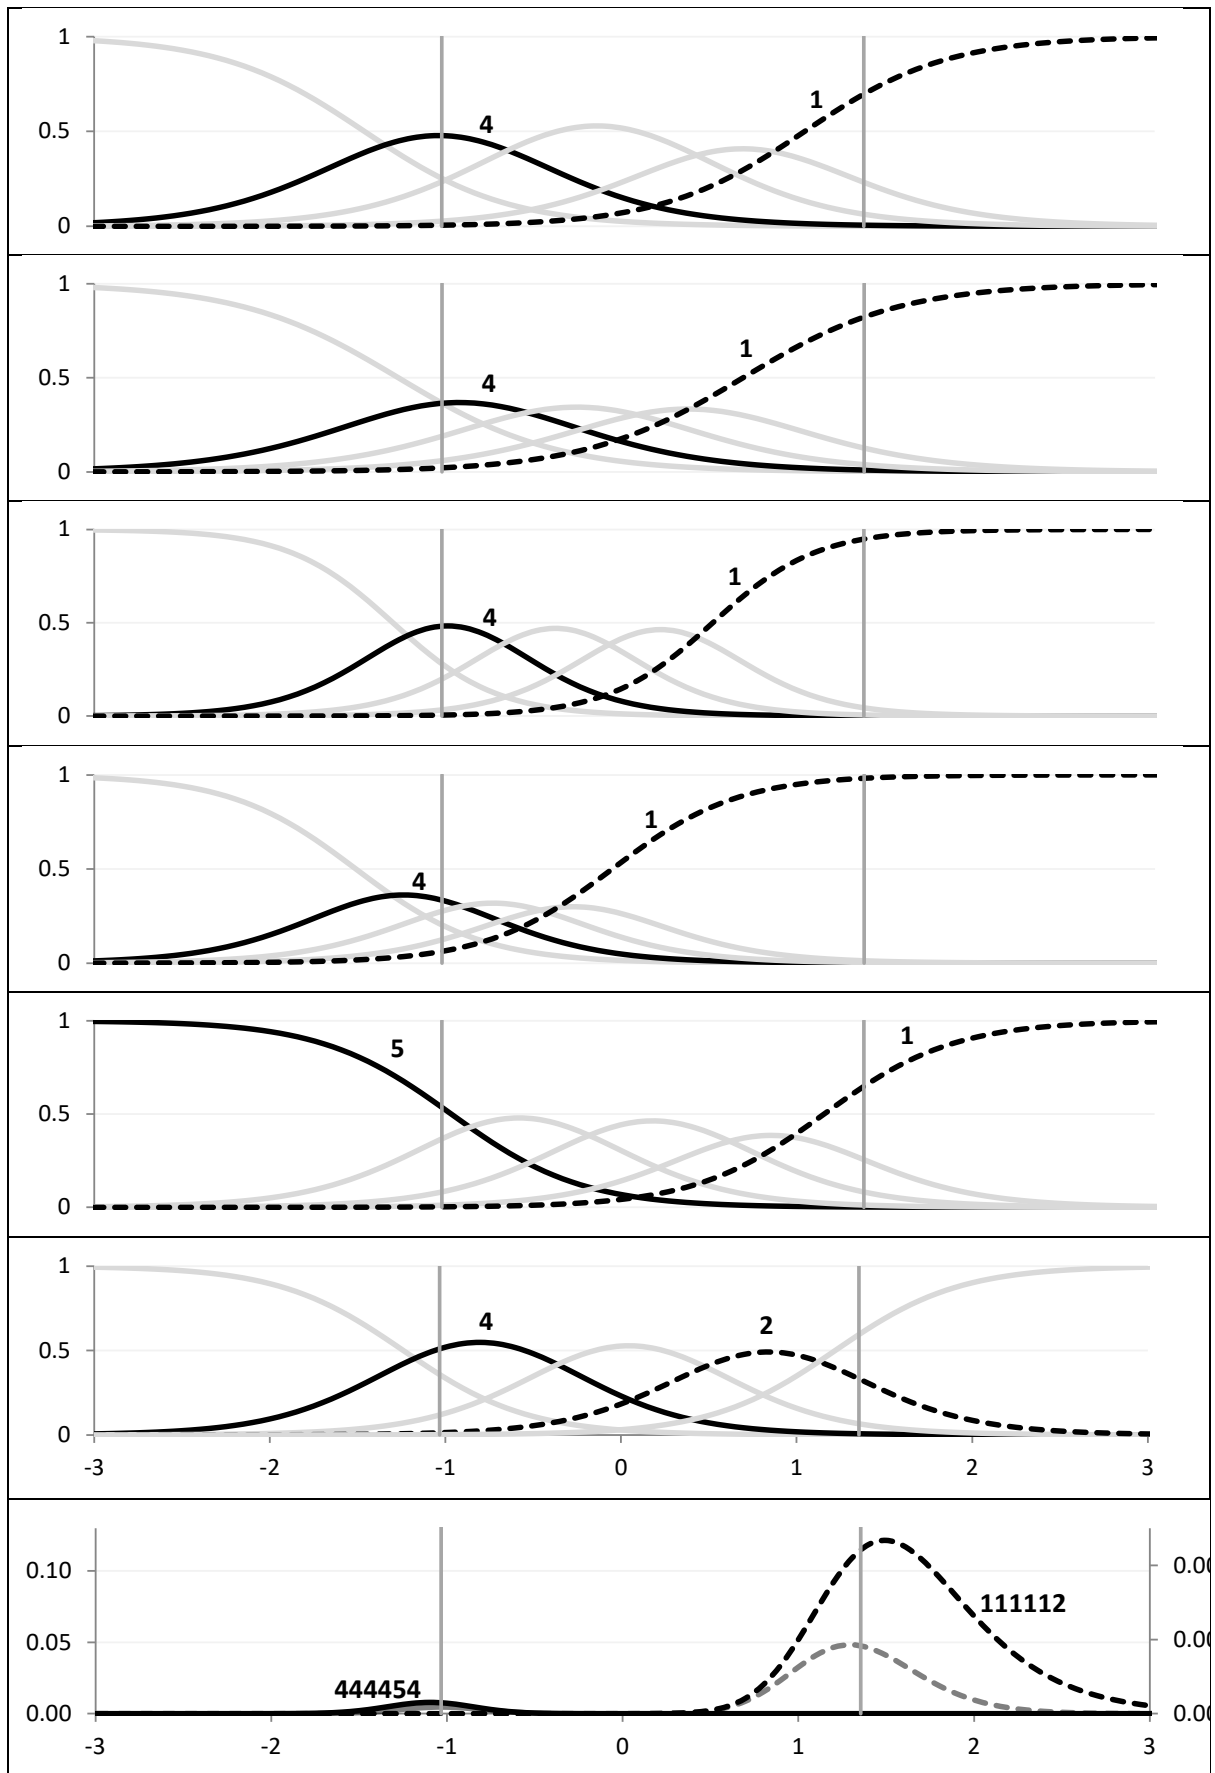

Appendix Figure 1 illustrates the calculation of the probability of different response combinations for different levels of health. Each of the first six panels illustrates the IRT model for each of the six chosen ReQoL items used for valuation. Item response values are coded so a high response indicates poor mental health. The response combination 444454 provides an estimated theta value of -1.03. The probability of each item response can be seen in the first six panels. The probability of the combined response (0.001) is seen in the lowest panel (black line). This probability is compared with the probability of other response combinations providing a theta estimate in the same range. The response combination 111112 provides an estimated theta value of 1.36. The probability of the combined response (0.017) seen in the lowest panel is compared with the probability of other response combinations providing a theta estimate in this range. The grey lines in the lower panel show the probability of each response combination weighted by a prior assumption about the theta distribution. This function is used for score estimation by the expected *a posteriori* (EAP) approach.

Appendix Figure 2 Histogram of observed TTO values for ReQoL-UI

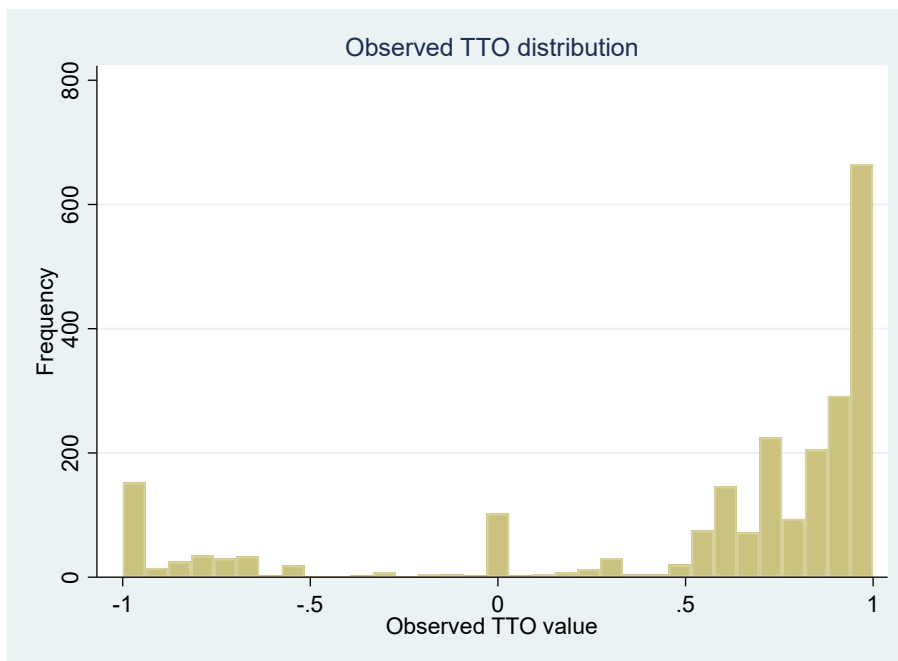

Appendix Figure 3 Plot of predicted versus observed utility values for the best mean OLS model (Model

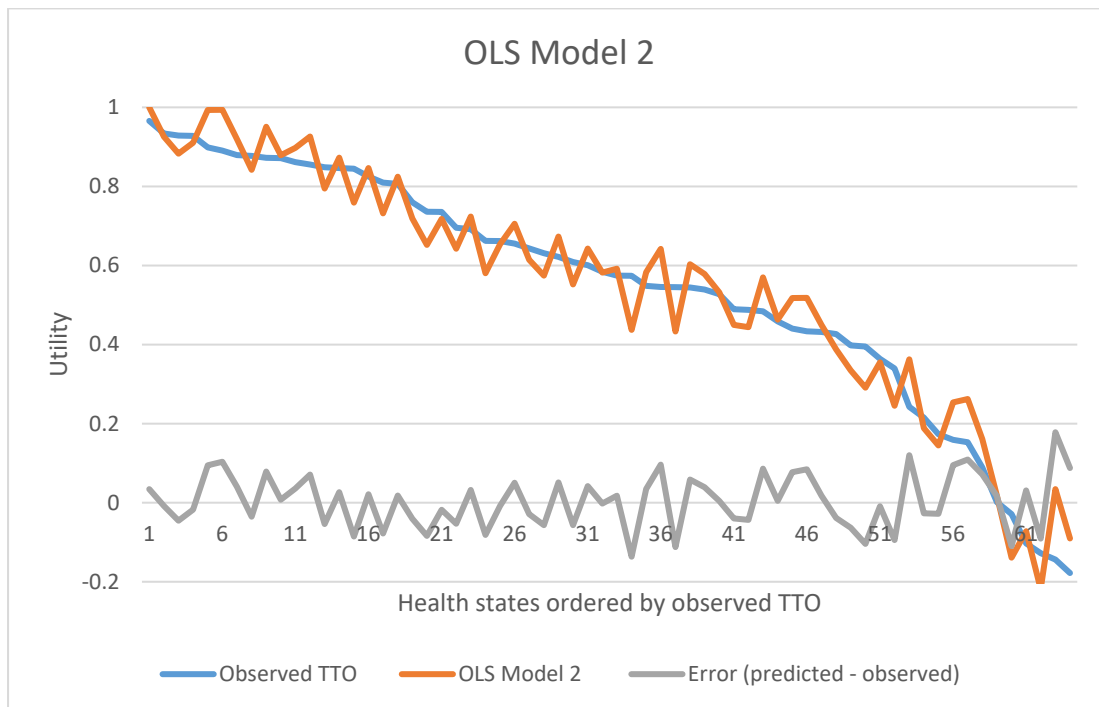

Appendix Table 1 Time Trade Off (TTO) Values by Health States from the Valuation Survey

| Health states <sup>a</sup> | N  | Mean TTO | SD     | Min    | Maximum | 25% percentile | Median | 75% percentile |
|----------------------------|----|----------|--------|--------|---------|----------------|--------|----------------|
| 1111111                    | 38 | 0.966    | 0.063  | 0.725  | 1       | 0.950          | 1      | 1              |
| 1111113 <sup>b</sup>       | 36 | 0.855    | 0.364  | -1     | 1       | 0.888          | 0.950  | 1              |
| 1111115 <sup>b</sup>       | 36 | 0.655    | 0.487  | -0.825 | 1       | 0.625          | 0.825  | 0.925          |
| 1111125                    | 42 | 0.662    | 0.544  | -1     | 1       | 0.700          | 0.888  | 0.981          |
| 1111211                    | 34 | 0.899    | 0.245  | 0      | 1       | 0.925          | 0.978  | 1              |
| 1111224                    | 41 | 0.546    | 0.644  | -1     | 1       | 0.525          | 0.825  | 1              |
| 1111322                    | 31 | 0.879    | 0.310  | -0.725 | 1       | 0.900          | 1      | 1              |
| 2111111                    | 42 | 0.890    | 0.226  | 0      | 1       | 0.925          | 0.958  | 1              |
| 2111124                    | 35 | 0.601    | 0.510  | -1     | 1       | 0.525          | 0.750  | 0.925          |
| 2111212                    | 37 | 0.934    | 0.1871 | 0      | 1       | 0.925          | 1      | 1              |
| 2111225                    | 40 | 0.574    | 0.607  | -1     | 1       | 0.613          | 0.813  | 0.938          |
| 2111322                    | 34 | 0.928    | 0.083  | 0.675  | 1       | 0.925          | 0.938  | 1              |
| 2111334                    | 41 | 0.631    | 0.529  | -1     | 1       | 0.625          | 0.825  | 0.981          |
| 2121333                    | 32 | 0.877    | 0.190  | 0      | 1       | 0.825          | 0.925  | 1              |
| 2211321                    | 38 | 0.872    | 0.346  | -0.925 | 1       | 0.925          | 1      | 1              |
| 3111324                    | 43 | 0.662    | 0.551  | -1     | 1       | 0.675          | 0.875  | 1              |
| 3111334                    | 30 | 0.609    | 0.494  | -1     | 1       | 0.625          | 0.725  | 1              |
| 3121332                    | 40 | 0.846    | 0.308  | -0.725 | 1       | 0.838          | 0.938  | 1              |
| 3221335                    | 30 | 0.458    | 0.641  | -1     | 1       | 0.225          | 0.7    | 1              |
| 3231335                    | 43 | 0.545    | 0.607  | -1     | 1       | 0.525          | 0.725  | 0.925          |
| 3231434                    | 35 | 0.489    | 0.587  | -1     | 1       | 0.300          | 0.725  | 0.875          |
| 3321331                    | 41 | 0.862    | 0.319  | -0.925 | 1       | 0.925          | 0.950  | 1              |
| 3321431                    | 31 | 0.928    | 0.108  | 0.575  | 1       | 0.900          | 0.971  | 1              |
| 3331331                    | 33 | 0.872    | 0.146  | 0.475  | 1       | 0.800          | 0.925  | 0.985          |
| 3331342                    | 37 | 0.806    | 0.429  | -1     | 1       | 0.825          | 0.925  | 1              |
| 3331435                    | 28 | 0.427    | 0.630  | -1     | 1       | 0.125          | 0.713  | 0.813          |
| 3331445                    | 34 | 0.364    | 0.637  | -1     | 1       | 0              | 0.625  | 0.825          |
| 3332431                    | 41 | 0.825    | 0.350  | -0.825 | 1       | 0.850          | 0.925  | 1              |
| 3332442                    | 36 | 0.849    | 0.326  | -0.975 | 1       | 0.838          | 0.925  | 1              |
| 3333333 <sup>b</sup>       | 40 | 0.845    | 0.183  | 0      | 1       | 0.738          | 0.900  | 0.983          |
| 3333443                    | 36 | 0.760    | 0.354  | -0.975 | 1       | 0.725          | 0.825  | 0.963          |
| 3432444                    | 37 | 0.243    | 0.747  | -1     | 1       | -0.650         | 0.625  | 0.750          |
| 3433445                    | 36 | 0.395    | 0.658  | -1     | 1       | 0.188          | 0.650  | 0.825          |
| 3443445                    | 34 | 0.159    | 0.729  | -1     | 1       | -0.700         | 0.450  | 0.775          |
| 4333444                    | 40 | 0.398    | 0.649  | -1     | 1       | 0.113          | 0.625  | 0.825          |
| 4343445                    | 38 | 0.339    | 0.638  | -1     | 1       | 0              | 0.625  | 0.775          |
| 4433445                    | 35 | 0.153    | 0.750  | -1     | 1       | -0.775         | 0.575  | 0.725          |
| 4443442                    | 34 | 0.810    | 0.320  | -0.7   | 1       | 0.750          | 0.913  | 1              |
| 4443545                    | 39 | 0.215    | 0.701  | -1     | 1       | -0.375         | 0.550  | 0.725          |

| Health states <sup>a</sup> | N  | Mean TTO | SD    | Min    | Maximum | 25% percentile | Median | 75% percentile |
|----------------------------|----|----------|-------|--------|---------|----------------|--------|----------------|
| 4444443                    | 34 | 0.696    | 0.520 | -1     | 1       | 0.725          | 0.888  | 1              |
| 4444543                    | 35 | 0.644    | 0.543 | -1     | 1       | 0.638          | 0.800  | 0.965          |
| 4444553                    | 39 | 0.584    | 0.542 | -1     | 1       | 0.625          | 0.725  | 0.875          |
| 4454543                    | 41 | 0.539    | 0.576 | -1     | 1       | 0.525          | 0.725  | 0.925          |
| 4455552                    | 34 | 0.549    | 0.640 | -1     | 1       | 0.575          | 0.800  | 0.950          |
| 4543442                    | 30 | 0.736    | 0.442 | -0.825 | 1       | 0.725          | 0.825  | 1              |
| 4543545                    | 38 | 0.089    | 0.729 | -1     | 1       | -0.675         | 0.300  | 0.700          |
| 4544441                    | 33 | 0.692    | 0.514 | -1     | 1       | 0.725          | 0.925  | 0.950          |
| 4544542                    | 27 | 0.622    | 0.529 | -1     | 1       | 0.625          | 0.800  | 0.950          |
| 4544554                    | 37 | 0.173    | 0.725 | -1     | 1       | -0.675         | 0.575  | 0.675          |
| 4545553                    | 28 | 0.440    | 0.694 | -1     | 1       | 0.400          | 0.750  | 0.825          |
| 4554541                    | 35 | 0.736    | 0.498 | -1     | 1       | 0.775          | 0.925  | 0.954          |
| 4554551                    | 44 | 0.544    | 0.667 | -1     | 1       | 0.613          | 0.825  | 0.938          |
| 4555552                    | 39 | 0.528    | 0.551 | -1     | 1       | 0.525          | 0.725  | 0.825          |
| 5355553                    | 28 | 0.488    | 0.648 | -1     | 1       | 0.312          | 0.725  | 0.938          |
| 5455555                    | 34 | -0.178   | 0.781 | -1     | 1       | -1             | -0.425 | 0.625          |
| 5544553                    | 33 | 0.433    | 0.657 | -1     | 1       | 0.275          | 0.725  | 0.875          |
| 5545551                    | 43 | 0.484    | 0.657 | -1     | 1       | 0.075          | 0.725  | 0.950          |
| 5553554                    | 33 | -0.144   | 0.783 | -1     | 1       | -1             | -0.275 | 0.650          |
| 5554545                    | 34 | 0.002    | 0.761 | -1     | 1       | -0.725         | 0      | 0.675          |
| 5554555                    | 32 | -0.103   | 0.728 | -1     | 1       | -0.813         | 0      | 0.638          |
| 5555543                    | 39 | 0.432    | 0.660 | -1     | 1       | 0.525          | 0.650  | 0.925          |
| 5555551 <sup>b</sup>       | 34 | 0.574    | 0.632 | -1     | 1       | 0.675          | 0.825  | 0.950          |
| 5555554                    | 37 | -0.029   | 0.739 | -1     | 1       | -0.750         | 0      | 0.625          |
| 5555555 <sup>b</sup>       | 35 | -0.128   | 0.727 | -1     | 1       | -0.775         | 0      | 0.625          |

<sup>a</sup> The health states are in the following order: activity (*act5p*); belonging (*bel2*); choice, control and autonomy (*cho4*); hope (*hop4*); self-perception (*sel2p*); well-being (*wb11p*) and physical health. <sup>b</sup> These health states were among the five selected purposively.

## Appendix Table 2 Random effects linear models

RE models; Dependent variable : distto , independent variable newtheta

| VARIABLES                                           | Model1a_NC | Model1b_NC | Model1c_NC | Model1d_NC | Model1e_NC | Model1f_NC |
|-----------------------------------------------------|------------|------------|------------|------------|------------|------------|
| θ (newtheta)                                        | -0.619***  | -0.593***  | -0.602***  | -0.441***  | -0.455***  | -0.472***  |
| phy2                                                | 0.0783**   |            |            | 0.0889     |            |            |
| phy3                                                | 0.00232    | -0.0262    |            | 0.0266     | 0.0181     | -0.0712**  |
| phy4                                                | -0.335***  | -0.357***  | -0.349***  | -0.141***  | -0.148***  | -0.148***  |
| phy5                                                | -0.398***  | -0.424***  | -0.416***  | -0.201***  | -0.205***  | -0.208***  |
| inter2                                              |            |            |            | -0.151     |            |            |
| inter3                                              |            |            |            | -0.165     | -0.147     |            |
| inter4                                              |            |            |            | -0.492***  | -0.478***  | -0.469***  |
| inter5                                              |            |            |            | -0.465***  | -0.454***  | -0.440***  |
| Constant                                            | 1          | 1          | 1          | 1          | 1          | 1          |
| Observations                                        | 2303       | 2303       | 2303       | 2303       | 2303       | 2303       |
| RMSE                                                | 0.1143     | 0.1211     | 0.1207     | 0.0822     | 0.0828     | 0.0843     |
| MAE                                                 | 0.0945     | 0.1037     | 0.1034     | 0.0693     | 0.0712     | 0.0730     |
| AIC                                                 | 3486       | 3491       | 3490       | 3451       | 3449       | 3449       |
| BIC                                                 | 3527       | 3525       | 3518       | 3514       | 3500       | 3495       |
| Number of health states with errors >0.1 (abs)      | 29         | 33         | 32         | 13         | 14         | 18         |
| Percentage of health states with errors >0.1 (abs)  | 45%        | 52%        | 50%        | 20%        | 22%        | 28%        |
| Number of health states with errors >0.05 (abs)     | 46         | 49         | 50         | 39         | 42         | 45         |
| Percentage of health states with errors >0.05 (abs) | 72%        | 77%        | 78%        | 61%        | 66%        | 70%        |
| Min utility for the 64 states                       | -0.017     | -0.016     | -0.019     | -0.108     | -0.114     | -0.12      |
| Max utility for the 64 states                       | 1.002      | 1          | 1          | 1.027      | 1.018      | 1          |



### Appendix Table 3 Random Effect quadratic models

Dependent variable : distto , independent variable newtheta

| VARIABLES                                           | Quadratic models |           |           |           |           |           |           |
|-----------------------------------------------------|------------------|-----------|-----------|-----------|-----------|-----------|-----------|
|                                                     | Model2a          | Model2b   | Model2c   | Model2d   | Model2e   | Model2f   | Model2g   |
| θ (newtheta)                                        | 0.0701           | 0.0612    | 0.0280    | 0.0278    | 0.0278    | 0.0148    |           |
| θ2 (newthetasq)                                     | -0.747***        | -0.739*** | -0.582*** | -0.581*** | -0.591*** | -0.558*** | -0.574*** |
| phy2                                                | -0.00599         |           | -0.0330   | -0.0321   | -0.0306   |           |           |
| phy3                                                | -0.0533*         | -0.0508*  | -0.0495   | -0.0494   | 0.0895*** | 0.0762*** | 0.0770*** |
| phy4                                                | -0.402***        | -0.399*** | -0.265*** | -0.265*** | -0.267*** | -0.261*** | -0.264*** |
| phy5                                                | -0.463***        | -0.461*** | -0.292*** | -0.292*** | -0.294*** | -0.288*** | -0.290*** |
| inter2                                              |                  |           | 0.00171   |           |           |           |           |
| inter3                                              |                  |           | -0.0668   | -0.0671   |           |           |           |
| inter4                                              |                  |           | -0.310*** | -0.310*** | -0.302*** | -0.292*** | -0.288*** |
| inter5                                              |                  |           | -0.350*** | -0.351*** | -0.341*** | -0.330*** | -0.329*** |
| Constant                                            | 1                | 1         |           | 1         | 1         | 1         | 1         |
| Observations                                        | 2303             | 2303      | 2303      | 2303      | 2303      | 2303      | 2303      |
| RMSE                                                | 0.0834           | 0.0835    | 0.0688    | 0.0688    | 0.0687    | 0.0697    | 0.0700    |
| MAE                                                 | 0.0648           | 0.0649    | 0.0566    | 0.0566    | 0.0567    | 0.0574    | 0.0576    |
| AIC                                                 | 3443             | 3442      | 3430      | 3428      | 3427      | 3426      | 3424      |
| BIC                                                 | 3489             | 3482      | 3499      | 3492      | 3484      | 3477      | 3470      |
| Number of health states with errors >0.1 (abs)      | 14               | 14        | 8         | 8         | 10        | 10        | 9         |
| Percentage of health states with errors >0.1 (abs)  | 22%              | 22%       | 13%       | 13%       | 16%       | 16%       | 14%       |
| Number of health states with errors >0.05 (abs)     | 32               | 33        | 29        | 29        | 30        | 32        | 32        |
| Percentage of health states with errors >0.05 (abs) | 50%              | 52%       | 45%       | 45%       | 47%       | 50%       | 50%       |
| Min utility for the 64 states                       | -0.14            | -0.139    | -0.196    | -0.195    | -0.199    | -0.191    | -0.193    |
| max utility for the 64 states                       | 1                | 1         | 1         | 1         | 1         | 1         | 1         |

### Appendix Table 4 Random Effect cubic models

Dependent variable : distto , independent variable newtheta

| VARIABLES                                           | Model3a   | Model3b   | Model3c   | Model3d   | Model3e   | Model3f   | Model3g   |
|-----------------------------------------------------|-----------|-----------|-----------|-----------|-----------|-----------|-----------|
| θ (newtheta)                                        | 0.399*    | 0.364     | 0.280     | 0.217     | 0.227     | 0.147     |           |
| θ2 (newthetasq)                                     | -1.688*** | -1.627*** | -1.304*   | -1.122*   | -1.158*   | -1.030    | -0.647*** |
| θ3 (newthetacube)                                   | 0.658     | 0.629     | 0.486     | -0.374    | 0.392     | 0.329     | 0.0809    |
| phy2                                                | -0.0142   |           | -0.0689   | -0.0359   | -0.0347   |           |           |
| phy3                                                | -0.0514*  | -0.0459   | -0.0567   | -0.0515   | 0.0873*** | -0.0729** | 0.0741*** |
| phy4                                                | -0.418*** | -0.412*** | -0.294*** | -0.282*** | -0.285*** | -0.275*** | -0.260*** |
| phy5                                                | -0.468*** | -0.463*** | -0.303*** | -0.297*** | -0.300*** | -0.292*** | -0.286*** |
| inter2                                              |           |           | 0.0629    |           |           |           |           |
| inter3                                              |           |           | -0.0455   | -0.0602   |           |           |           |
| inter4                                              |           |           | -0.272**  | -0.293*** | -0.285*** | -0.276*** | -0.293*** |
| inter5                                              |           |           | -0.330*** | -0.344*** | -0.335*** | -0.324*** | -0.331*** |
| Constant                                            | 1         | 1         | 1         | 1         | 1         | 1         | 1         |
| Observations                                        | 2303      | 2303      | 2303      | 2303      | 2303      | 2303      | 2303      |
| RMSE                                                | 0.0824    | 0.0827    | 0.0686    | 0.0692    | 0.0690    | 0.0702    | 0.0693    |
| MAE                                                 | 0.0649    | 0.0650    | 0.0568    | 0.0576    | 0.0576    | 0.0584    | 0.0574    |
| AIC                                                 | 3443      | 3441      | 3431      | 3430      | 3428      | 3427      | 3425      |
| BIC                                                 | 3495      | 3487      | 3506      | 3499      | 3491      | 3484      | 3477      |
| Number of health states with errors >0.1 (abs)      | 17        | 16        | 10        | 10        | 11        | 11        | 10        |
| Percentage of health states with errors >0.1 (abs)  | 27%       | 25%       | 16%       | 16%       | 17%       | 17%       | 16%       |
| Number of health states with errors >0.05 (abs)     | 36        | 33        | 29        | 30        | 31        | 32        | 33        |
| Percentage of health states with errors >0.05 (abs) | 56%       | 52%       | 45%       | 47%       | 48%       | 50%       | 52%       |
| Min utility for the 64 states                       | -0.098    | -0.097    | -0.17     | -0.172    | -0.175    | -0.17     | -0.183    |
| Max utility for the 64 states                       | 1.025     | 1.021     | 1.016     | 1.011     | 1.011     | 1.004     | 1         |

**Appendix Table 5 OLS models**

| VARIABLES                           | Model1    | Model 1c | Model 2  | Model 2c | Model2e      | Model 2f     | Model 3  | Model 3a | Model 3b | Model 3c | Model 3d |
|-------------------------------------|-----------|----------|----------|----------|--------------|--------------|----------|----------|----------|----------|----------|
| θ (newtheta)                        | -0.579*** | 0.433*** | 0.100    | 0.00978  | -0.052932    |              | 0.383    | 0.251    | 0.122    | 0.025    | -0.428*  |
| θ2 (newthetasq)                     |           |          | -        | -        | -            | -            |          |          |          |          |          |
| θ3 (newthetacube)                   |           |          | 0.767*** | 0.572*** | 0.5165521*** | 0.5795743*** | -1.605** | -1.275*  | -0.909   | -0.753   | 0.339    |
| phy2                                | 0.085**   | 0.059    | -0.014   | -0.0688  |              |              | 0.594    | 0.474    | 0.249    | 0.171    | -0.440   |
| phy3                                | 0.009     | 0.001    | -0.062*  | -0.0737  | 0.0836655*** | 0.0876205*** | -0.062*  | -0.083   | -0.074   | -0.067   | -0.031   |
| phy4                                | -0.323*** | -0.140** | 0.415*** | 0.284*** | 0.2701098*** | 0.2859731*** | 0.430*** | 0.312*** | 0.291*** | 0.276*** |          |
| phy5                                | -0.394*** | 0.189*** | 0.476*** | 0.294*** | 0.2839871*** | 0.2955383*** | 0.482*** | 0.307*** | 0.295*** | 0.286*** | 0.234*** |
| inter2                              |           | -0.099   |          | 0.0655   |              |              |          | 0.123    |          |          |          |
| inter3                              |           | -0.135   |          | -0.0365  |              |              |          | -0.013   | -0.040   | -0.025   | -0.089   |
| inter4                              |           | 0.503*** |          | 0.292*** | 0.2931935*** | 0.2741532*** |          | -0.254** | 0.295*** | 0.289*** | 0.705*** |
| inter5                              |           | 0.501*** |          | 0.362*** | 0.3559337*** | 0.3447323*** |          | 0.339*** | 0.368*** | 0.355*** | 0.432*** |
| Constant                            | 1         | 1        | 1        | 1        | 1            | 1            | 1        | 1        | 1        | 1        | 1        |
| Observations                        | 64        | 64       | 64       | 64       | 64           | 64           | 64       | 64       | 64       | 64       | 64       |
| Adjusted R-squared                  | 0.955     | 0.974    | 0.974    | 0.982    | 0.982        | 0.982        | 0.974    | 0.982    | 0.982    | 0.982    | 0.974    |
| RMSE                                | 0.1103    | 0.0817   | 0.0833   | 0.0673   | 0.0685       | 0.0688       | 0.0821   | 0.0666   | 0.0673   | 0.0683   | 0.0813   |
| MAE                                 | 0.0911    | 0.0690   | 0.0651   | 0.0561   | 0.0575       | 0.0575       | 0.0656   | 0.0559   | 0.0570   | 0.0579   | 0.0641   |
| AIC                                 | -91       | -121     | -125     | -144     | -147         | -149         | -124     | -143     | -144     | -144     | -124     |
| BIC                                 | -80       | -102     | -112     | -122     | -132         | -136         | -109     | -119     | -122     | -124     | -106     |
| Number of observations with AE >0.1 | 26        | 15       | 13       | 9        | 8            | 8            | 16       | 10       | 10       | 11       | 14       |

|                                          |       |        |        |        |        |       |        |        |        |        |        |
|------------------------------------------|-------|--------|--------|--------|--------|-------|--------|--------|--------|--------|--------|
| Percentage of observations with AE >0.1  | 41%   | 23%    | 20%    | 14%    | 13%    | 13%   | 25%    | 16%    | 16%    | 17%    | 22%    |
| Number of observations with AE >0.05     | 42    | 42     | 32     | 32     | 33     | 32    | 36     | 29     | 31     | 33     | 36     |
| Percentage of observations with AE >0.06 | 66%   | 66%    | 50%    | 50%    | 52%    | 50%   | 56%    | 45%    | 48%    | 52%    | 56%    |
| Min utility for the 64 states            | 0.027 | -0.124 | -0.143 | -0.219 | -0.209 | -0.22 | -0.111 | -0.196 | -0.202 | -0.199 | -0.235 |
| Max utility for the 64 states            | 1.009 | 1.001  | 1.002  | 1      | 1      | 1     | 1.024  | 1.013  | 1.003  | 1      | 1      |

**Appendix Table 6 Summary comparisons of the various models**

|                                                       | <b>RE models</b>              | <b>OLS mean model</b>         |
|-------------------------------------------------------|-------------------------------|-------------------------------|
| Observations                                          | 2303                          | 64                            |
| RMSE range                                            | 0.069 to 0.121                | 0.0666 to 0.1103              |
| MAE range                                             | 0.057 to 0.104                | 0.0559 to 0.0911              |
| Number of health states with errors >0.1 (abs) range  | 8 to 33                       | 8 to 26                       |
| Number of health states with errors >0.05 (abs) range | 29 to 50                      | 29 to 42                      |
| Min utility range for the 64 states across all models | -0.199 to -0.016              | -0.235 to 0.027               |
| max utility range for the 64 states across all models | 1 to 1.027                    | 1 to 1.024                    |
| Best models                                           | 2d and 2g                     | 2e and 2f                     |
| Other observations                                    | Cubic terms - not significant | Cubic terms - not significant |
